# Supplementary material for: Manual Therapy Effects on Nonspecific Neck Pain Are Not Mediated by Mechanisms Related to Conditioned Pain Modulation: A Randomized Clinical Trial
Source: MDPI journal article supplement (doi:10.3390/jcm12123894), 2023-06-07
Supplement: s1 [file s1]

## Supplementary Materials

**Table S1.** Association of baseline CPM and TSP with the effects of treatments on pain intensity and self-perceived improvement.

|                                                                   | Painful MT<br>(n = 19) |                   |               | Pain-free MT<br>(n = 19) |                   |               |
|-------------------------------------------------------------------|------------------------|-------------------|---------------|--------------------------|-------------------|---------------|
|                                                                   | CPM<br>parallel        | CPM<br>sequential | TSP           | CPM<br>parallel          | CPM<br>sequential | TSP           |
| <b>PPT C7</b> ,<br>t statistic (p value)                          | 0.94 (0.363)           | 1.36 (0.195)      | -0.55 (0.587) | -0.26 (0.800)            | -0.95 (0.357)     | -0.00 (0.996) |
| <b>PPT trapezius</b> ,<br>t statistic (p value)                   | 1.03 (0.320)           | 2.48 (0.025)      | -0.35 (0.730) | 0.22 (0.826)             | -0.87 (0.395)     | 0.70 (0.495)  |
| <b>PPT extensor ulnaris</b> , t<br>statistic (p value)            | 0.19 (0.853)           | 0.61 (0.551)      | -0.38 (0.710) | 0.32 (0.753)             | -0.37 (0.718)     | -0.45 (0.660) |
| <b>PPT tibialis anterior</b> , t<br>statistic (p value)           | 0.93 (0.368)           | 0.144 (0.170)     | -0.56 (0.581) | 0.14 (0.894)             | -1.45 (0.167)     | 0.20 (0.894)  |
| <b>Pain intensity post-<br/>treatment</b> , t statistic (p value) | -0.69 (0.499)          | 0.88 (0.393)      | -0.43 (0.674) | 0.85 (0.408)             | 1.59 (0.131)      | 0.96 (0.352)  |
| <b>Pain intensity post-7 days</b> ,<br>t statistic (p value)      | -0.70 (0.498)          | -0.89 (0.392)     | -0.78 (0.449) | -2.61 (0.019)            | -0.14 (0.892)     | -0.07 (0.944) |
| <b>GROC post-treatment</b> ,<br>z statistic (p value)             | -0.85 (0.396)          | -0.37 (0.714)     | -0.28 (0.779) | -0.81 (0.416)            | -0.74 (0.456)     | -0.39 (0.697) |
| <b>GROC post-7 days</b> ,<br>z statistic (p value)                | -2.23 (0.026)          | 0.44 (0.659)      | 1.48 (0.140)  | 1.08 (0.278)             | 0.38 (0.707)      | 0.46 (0.648)  |

\* Significant differences ( $p < 0.01$ ). MT: manual therapy; CPM: conditioned pain modulation; TSP: temporal summation of pain; PPT: pressure pain threshold; GROC: global rating of change

**Table S2.** Association of expectations, pain catastrophism and pain anxiety with the effects of treatments on pain intensity and self-perceived improvement.

|                                                              | Painful MT (n = 19) | Pain-free MT (n = 19) |
|--------------------------------------------------------------|---------------------|-----------------------|
|                                                              | Expectations        | Expectations          |
| <b>PPT C7</b> , F statistic (p value)                        | 0.35 (0.709)        | 2.40 (0.125)          |
| <b>PPT trapezius</b> , F statistic (p value)                 | 0.10 (0.902)        | 5.43 (0.017)          |
| <b>PPT extensor ulnaris</b> , F statistic (p value)          | 0.29 (0.751)        | 0.64 (0.541)          |
| <b>PPT tibialis anterior</b> , F statistic (p value)         | 0.97 (0.400)        | 0.52 (0.602)          |
| <b>Pain intensity post-treatment</b> , F statistic (p value) | 0.31 (0.738)        | 0.65 (0.537)          |
| <b>Pain intensity post-7 days</b> , F statistic (p value)    | 6.15 (0.013)        | 0.55 (0.591)          |
| <b>GROC post-treatment</b> , Chi <sup>2</sup> (p value)      | 1.06 (0.588)        | 1.76 (0.414)          |
| <b>GROC post-7 days</b> , Chi <sup>2</sup> (p value)         | 0.75 (0.687)        | 0.21 (0.901)          |

\* Significant differences ( $p < 0.01$ ). MT: manual therapy; PPT: pressure pain threshold; GROC: global rating of change

**Table S3.** Number of subjects by treatment assignment and assessor's guess

| Assignment   | Assessor's response |              |            |       |
|--------------|---------------------|--------------|------------|-------|
|              | Painful MT          | Pain-free MT | Don't know | Total |
| Painful MT   | 6                   | 1            | 10         | 17    |
| Pain-free MT | 3                   | 3            | 12         | 18    |
| Total        | 9                   | 4            | 22         | 35    |

MT: manual therapy
